# Supplementary material for: FOXM1 evokes 5-fluorouracil resistance in colorectal cancer depending on ABCC10
Source: PubMed Central journal article supplement (PMC5352423; doi:10.18632/oncotarget.14351), 2016-12-29
Supplement: oncotarget-08-8574-s001.pdf [file oncotarget-08-8574-s001.pdf]

## FOXM1 evokes 5-fluorouracil resistance in colorectal cancer depending on ABCC10

### SUPPLEMENTARY FIGURES AND TABLES

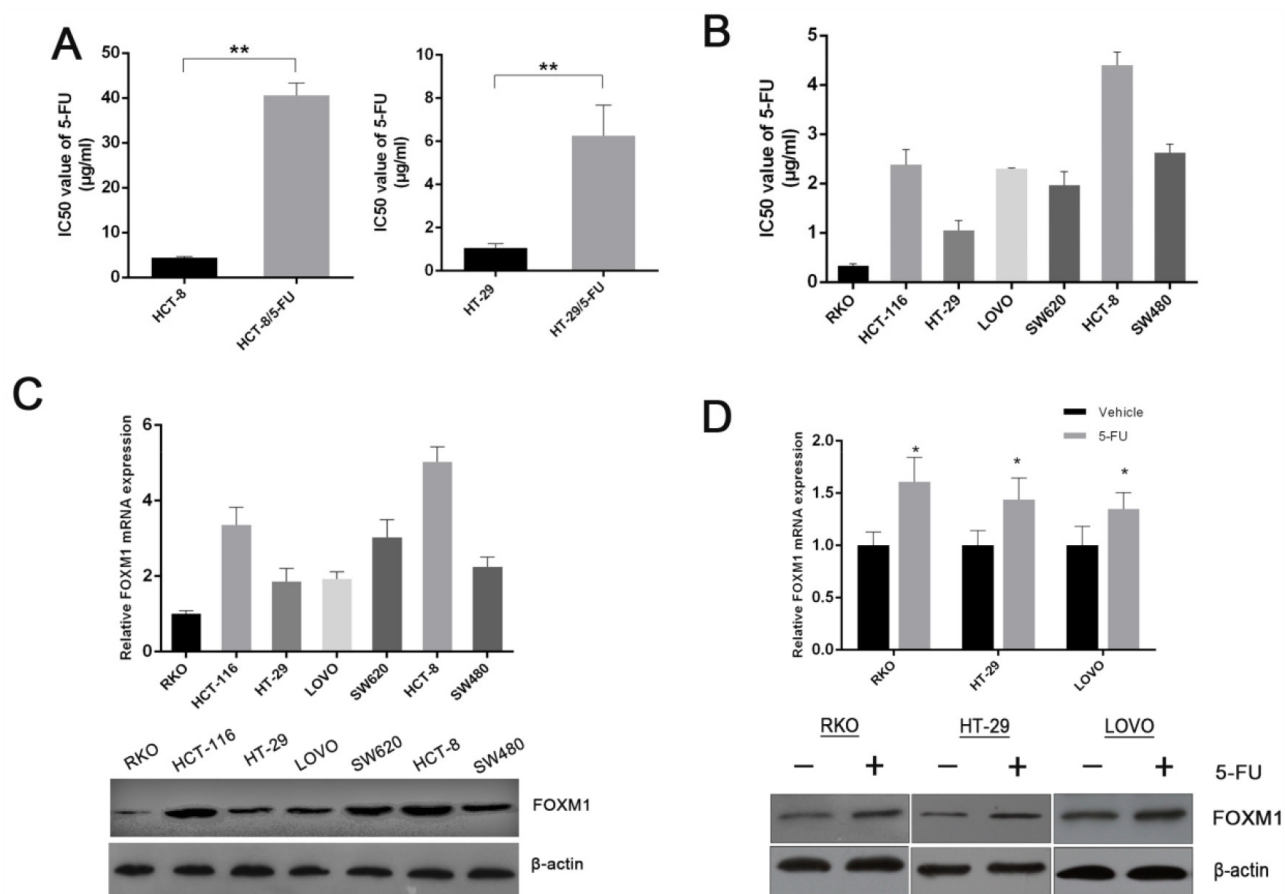

**Supplementary Figure 1:** **A.** IC50 values of 5-FU in HCT-8 and HCT-8/5-FU cells or HT-29 and HT-29/5-FU measured by CCK-8. **B.** IC50 values of 5-FU in colorectal cancer cell lines measured by CCK-8. **C.** qRT-PCR and Western blot assay of FOXM1 in colorectal cancer cell lines. **D.** qRT-PCR and Western blot assay of FOXM1 in RKO, HT-29, LOVO cell lines before and after 5-FU treatment.

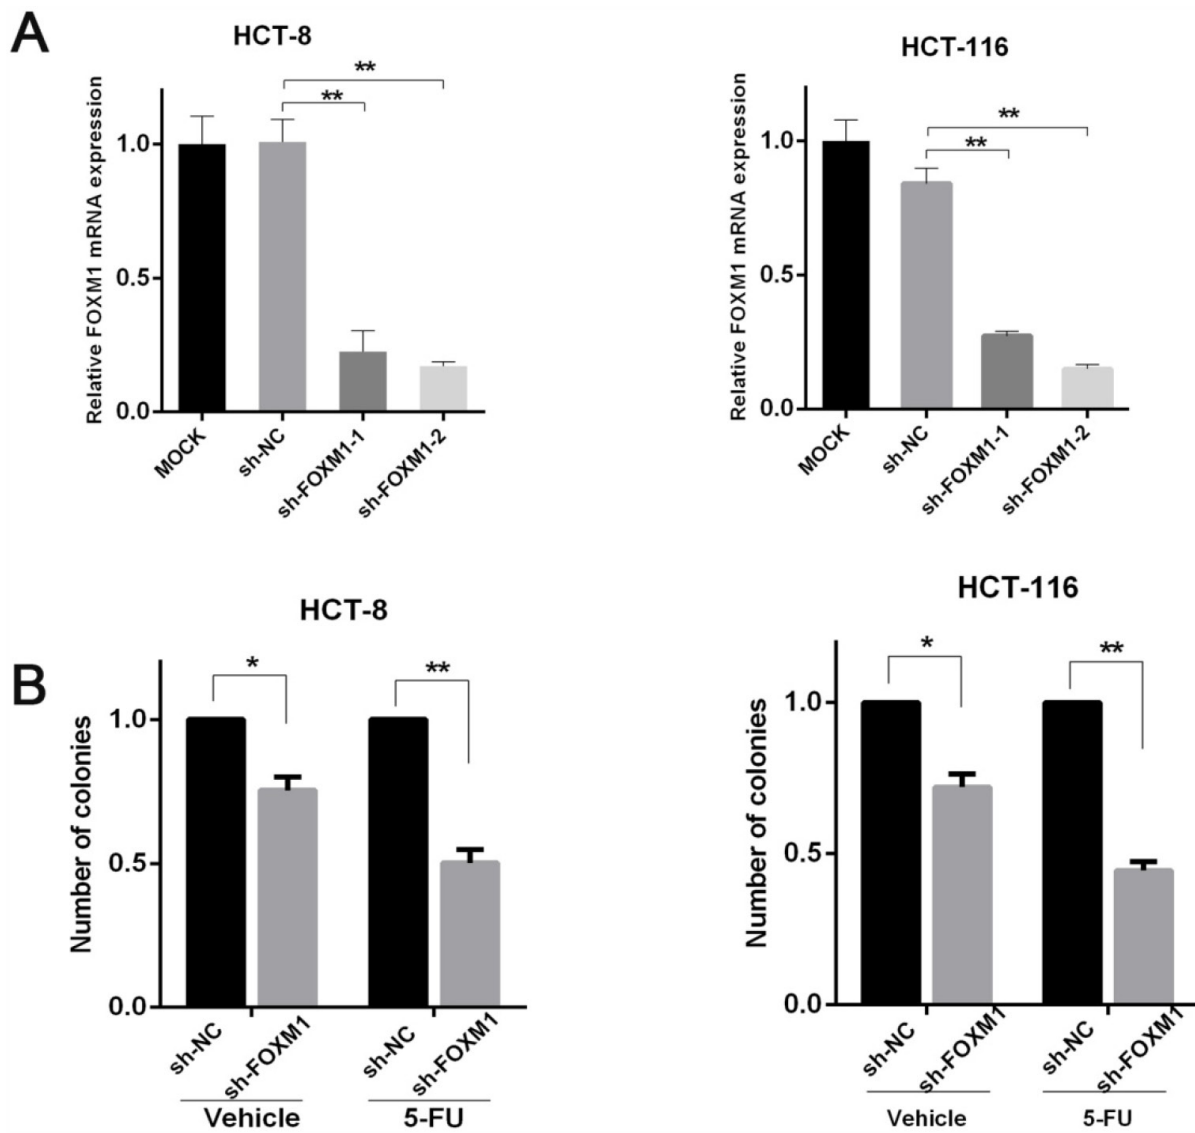

**Supplementary Figure 2:** A. qRT-PCR analysis of FOXM1 in knockdown and control CRC cell lines. B. Colony formation of FOXM1 knockdown and control CRC cells treated with 5-FU or not (n=3).

**A**

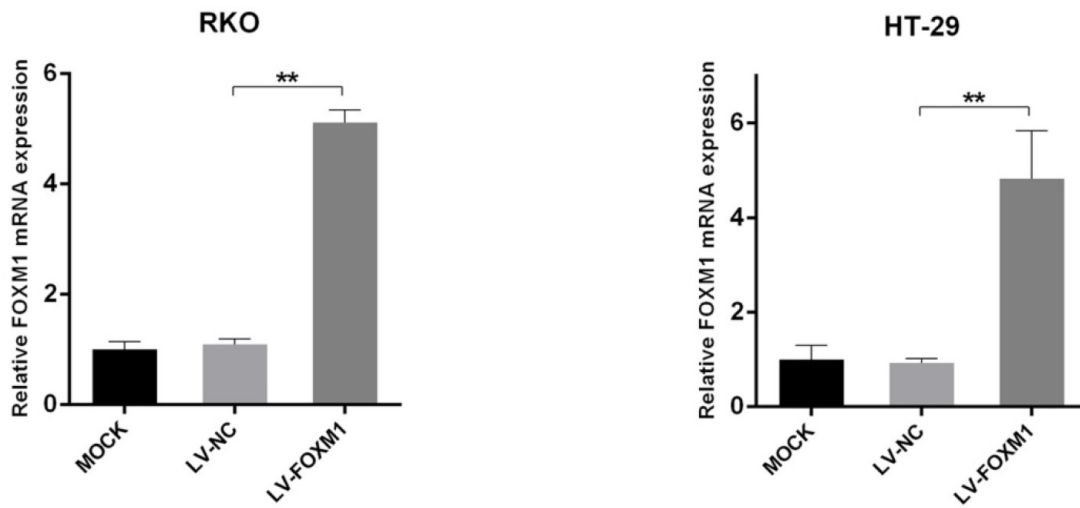

**B**

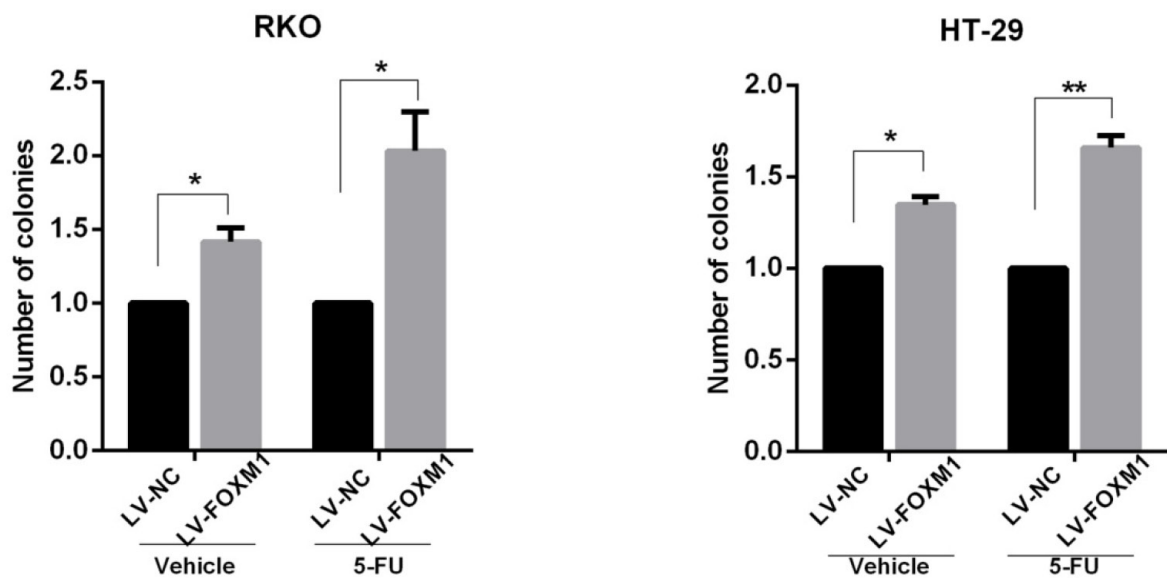

**Supplementary Figure 3: A.** qRT-PCR analysis of FOXM1 in overexpressing and control CRC cell lines. **B.** Colony formation of FOXM1 overexpression and control CRC cells treated with 5-FU or not (n=3).

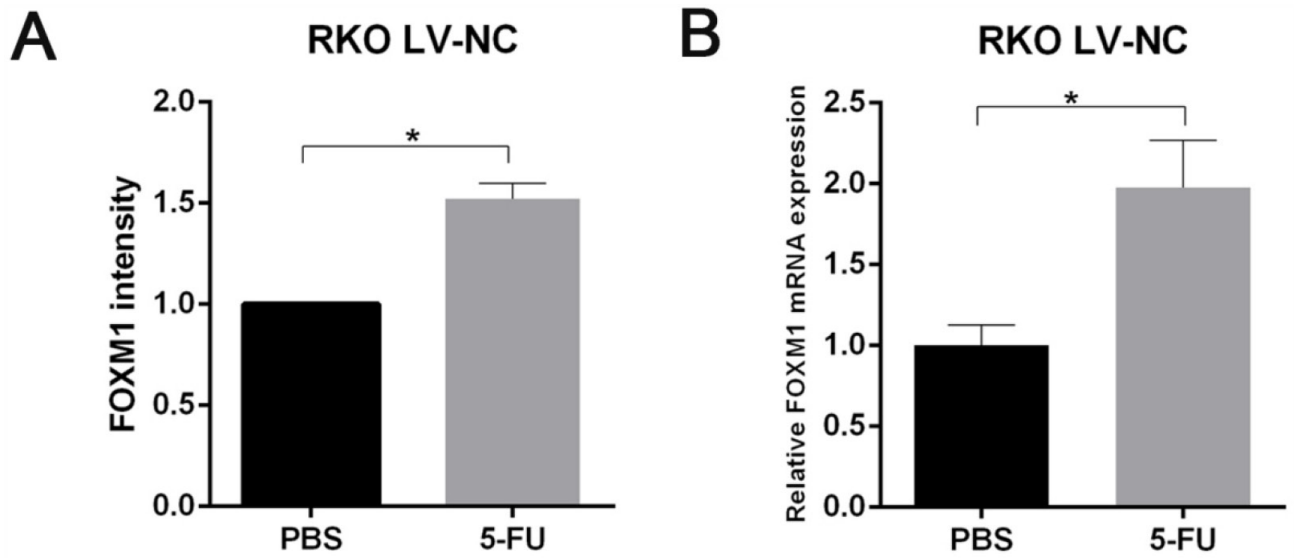

**Supplementary Figure 4:** **A.** Quantification of the IHC staining of FOXM1 in RKO LV-NC xenografts from mice treated with 5-FU or not (n=3). **B.** qRT-PCR analysis of FOXM1 in RKO LV-NC xenografts from mice treated with 5-FU or not (n=3).

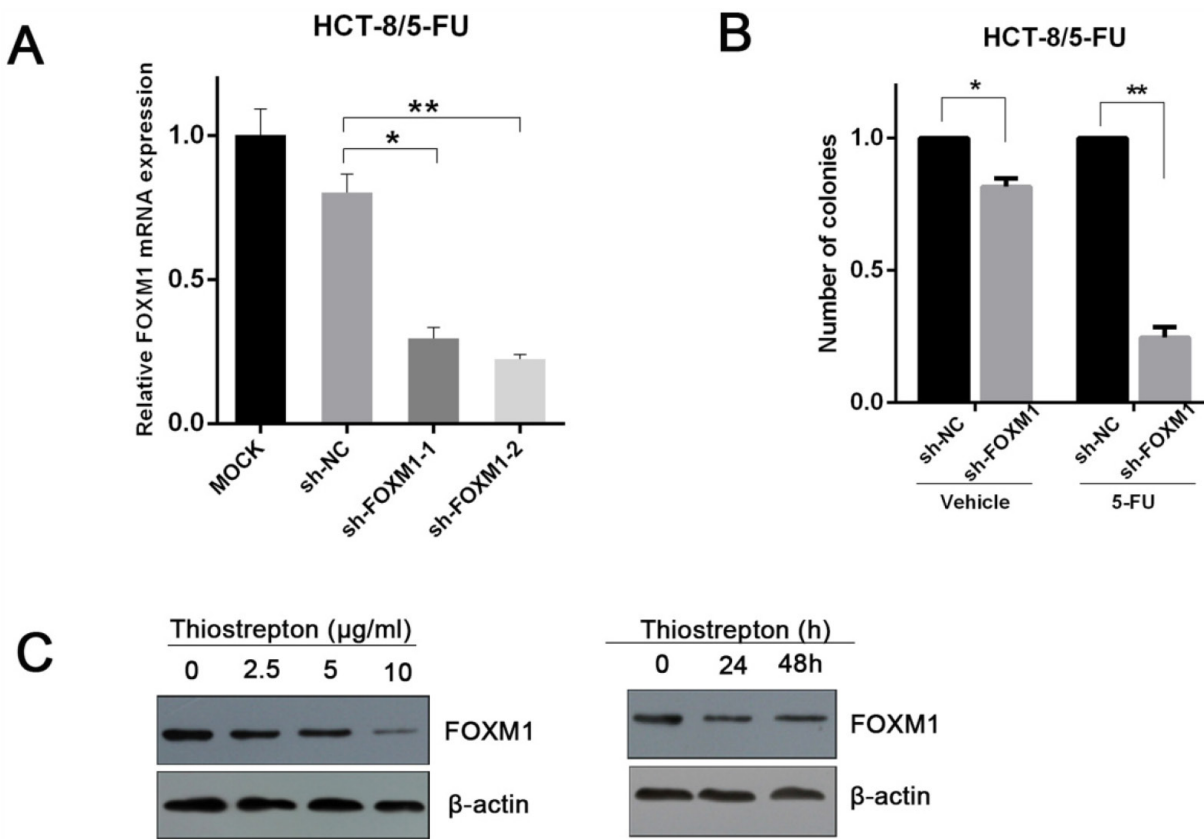

**Supplementary Figure 5:** **A.** qRT-PCR analysis of FOXM1 in knockdown and control HCT-8/5-FU cells. **B.** Colony formation of FOXM1 knockdown and control 5-FU resistant CRC cells treated with 5-FU or not (n=3). **C.** Western blot assay of FOXM1 in HCT-8/5-FU cells treated with thiostrepton with indicated concentrations or time.

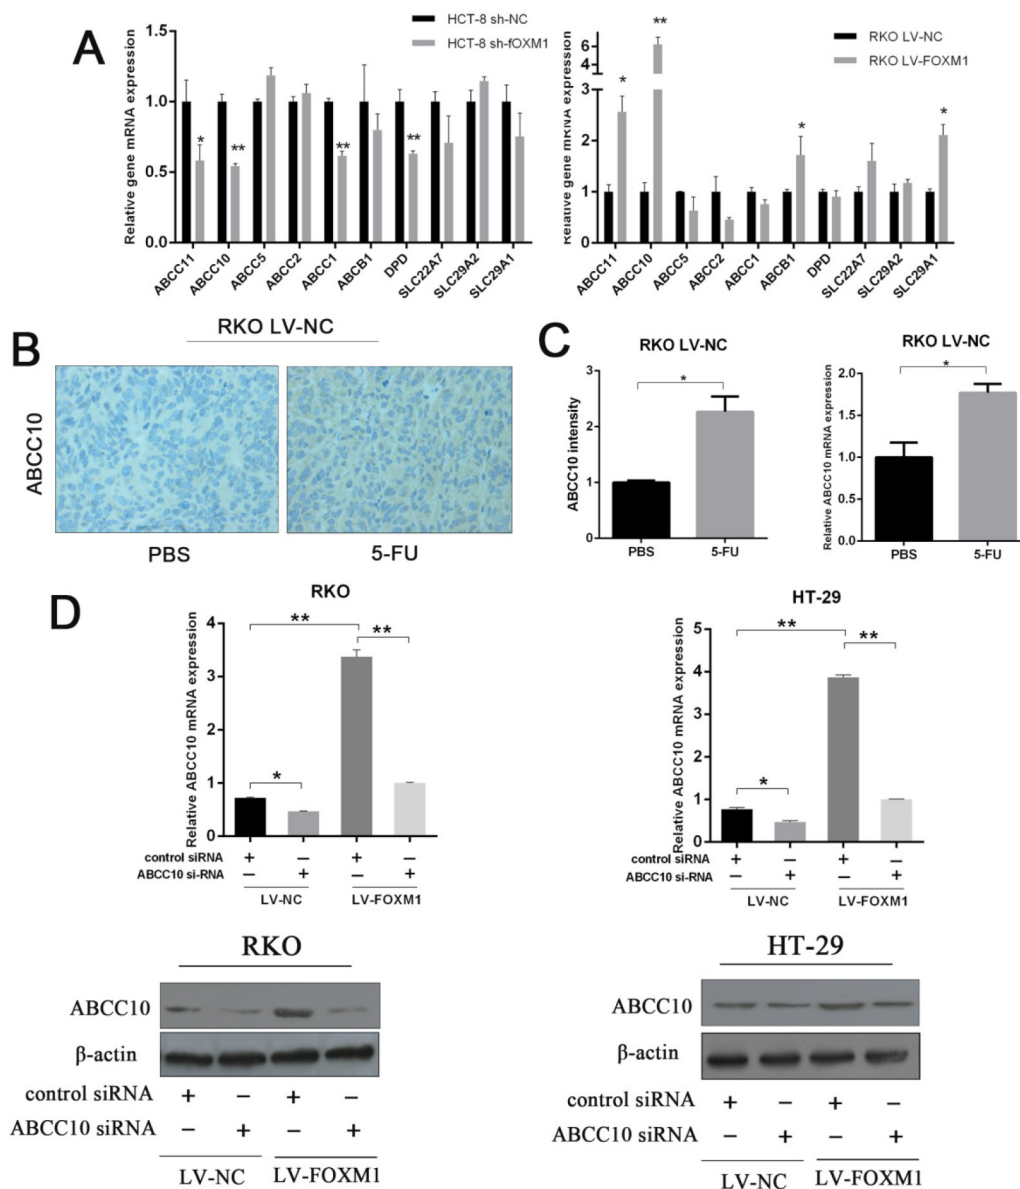

**Supplementary Figure 6:** **A.** qRT-PCR analysis of indicated genes in FOXM1 knockdown or overexpressing CRC cells. **B.** Representative immunostaining of ABCC10 in RKO LV-NC xenografts from mice treated with 5-FU or not (n=3). **C.** Quantification of the IHC stainings and qPCR levels of ABCC10 in RKO LV-NC xenografts from mice treated with 5-FU or not (n=3). **D.** qRT-PCR and Western blot analysis of ABCC10 level in FOXM1 overexpressing cells along with ABCC10 siRNA tranfection.

**Supplementary Table 1: Gene expression values in resistant and sensitive CRC patients assessed by microarray**

See Supplementary File 1

**Supplementary Table 2: Sequences of shRNA and siRNA Against Specific Target**

|            |                   |                       |
|------------|-------------------|-----------------------|
| sh-FOXMI-1 | 5'-3'             | GGCUGCACUAUCAACAAUATT |
| sh-FOXMI-2 | 5'-3'             | CCAACAGGAGTCTAATCAA   |
| sh-NC      | 5'-3'             | TTCTCCGAACGTGTACGT    |
| si-ABCC10  | Sense (5'-3')     | CCUCCUGCUUCCGUCUUTT   |
|            | Antisense (5'-3') | AAGACGGAAAGCAGGAAGGTT |
| si-NC      | Sense (5'-3')     | UUCUCCGAACGUGUCACGUTT |
|            | Antisense (5'-3') | ACGUGACACGUUCGGAGAATT |



**Supplementary Table 3: Sequences of PCR primers used in this study**

See Supplementary File 2
